# Supplementary material
Source: publisher site journal article supplement (https://www.dovepress.com/article/582081)
Supplement: Supplementary file 1 [file 582081_Supplementary%20Materials_1.pdf]

## Supplementary materials

### Supplementary Figures

Supplementary Figure 1. Progression-free survival (A) and overall survival (B) of stage III NSCLC patients categorized by Immuno-neoadj and Pacific-model groups. (C) The radiotherapy target area of a patient with regional failure manifesting as new-onset left supraclavicular LN metastasis

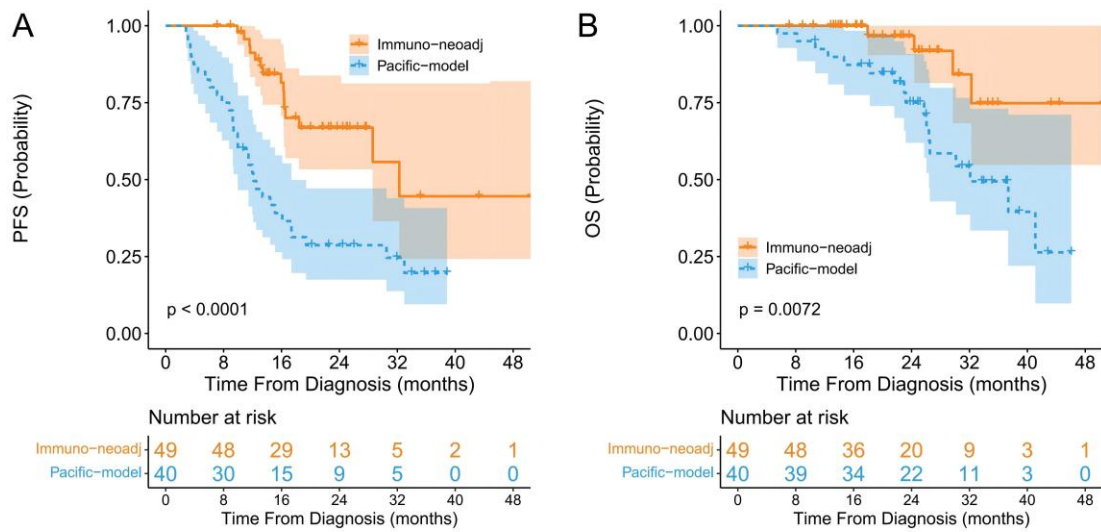

**C**

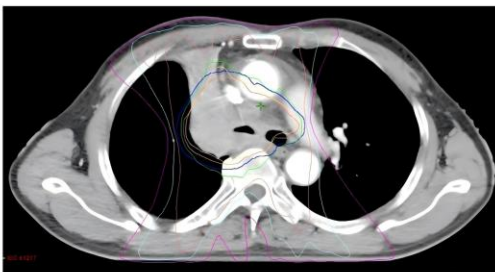

## Supplementary tables

Supplementary table 1. Summary of the dose-volume histogram-based parameters of the planned target volumes of patients from the Third Xiangya Hospital

| Patient ID | Conventional radiotherapy | 3L-RT   |          |         |
|------------|---------------------------|---------|----------|---------|
|            | PTV V60                   | PTV V54 | PGTV V60 | GTV V74 |
| No.1       | 95                        | 95.00   | 99.00    | 95.00   |
| No.2       | 95                        | 96.00   | 99.00    | 95.00   |
| No.3       | 95                        | 95.00   | 97.20    | 95.00   |
| No.4       | 95                        | 95.00   | 99.00    | 95.00   |
| No.5       | 95                        | 96.00   | 99.00    | 95.00   |
| No.6       | 95                        | 96.00   | 100.00   | 95.00   |
| No.7       | 95                        | 97.00   | 99.00    | 95.00   |
| No.8       | 95                        | 95.00   | 97.60    | 95.00   |
| No.9       | 95                        | 94.60   | 100.00   | 95.00   |
| No.10      | 95                        | 96.00   | 99.00    | 95.00   |
| No.11      | 95                        | 95.00   | 97.00    | 95.00   |
| No.12      | 95                        | 95.00   | 99.00    | 100.00  |
| No.13      | 95                        | 95.00   | 100.00   | 95.00   |
| No.14      | 95                        | 95.00   | 100.00   | 99.00   |
| No.15      | 95                        | 95.60   | 99.00    | 95.00   |
| No.16      | 95                        | 95.00   | 99.00    | 95.00   |
| No.17      | 95                        | 96.00   | 97.00    | 95.00   |
| No.18      | 95                        | 96.00   | 98.00    | 95.00   |
| No.19      | 95                        | 95.00   | 97.00    | 95.00   |
| No.20      | 95                        | 96.00   | 99.00    | 95.00   |
| No.21      | 95                        | 95.00   | 97.00    | 95.00   |
| No.22      | 95                        | 95.00   | 97.00    | 95.00   |
| No.23      | 95                        | 96.00   | 98.00    | 95.00   |
| No.24      | 95                        | 95.00   | 98.00    | 95.70   |
| No.25      | 95                        | 95.00   | 99.00    | 95.00   |
| No.26      | 95                        | 94.50   | 100.00   | 95.00   |
| No.27      | 95                        | 95.00   | 96.00    | 100.00  |
| No.28      | 95                        | 96.00   | 99.00    | 95.00   |
| No.29      | 95                        | 95.00   | 98.00    | 95.00   |
| No.30      | 95                        | 95.60   | 98.00    | 95.00   |
| No.31      | 95                        | 95.00   | 99.00    | 97.00   |
| No.32      | 95                        | 95.00   | 95.40    | 97.00   |
| No.33      | 95                        | 95.00   | 98.00    | 97.00   |
| No.34      | 95                        | 94.70   | 100.00   | 95.00   |

|       |    |       |        |        |
|-------|----|-------|--------|--------|
| No.35 | 95 | 94.60 | 97.00  | 95.00  |
| No.36 | 95 | 95.00 | 99.00  | 99.00  |
| No.37 | 95 | 97.00 | 100.00 | 95.00  |
| No.38 | 95 | 95.00 | 97.00  | 95.00  |
| No.39 | 95 | 95.00 | 97.00  | 95.00  |
| No.40 | 95 | 95.00 | 96.00  | 95.00  |
| No.41 | 95 | 95.00 | 99.00  | 98.00  |
| No.42 | 95 | 94.80 | 99.00  | 95.00  |
| No.43 | 95 | 95.00 | 99.00  | 95.00  |
| No.44 | 95 | 95.00 | 98.00  | 95.00  |
| No.45 | 95 | 95.00 | 97.00  | 95.00  |
| No.46 | 95 | 95.00 | 99.00  | 95.00  |
| No.47 | 95 | 96.00 | 97.00  | 95.00  |
| No.48 | 95 | 94.00 | 97.00  | 95.00  |
| No.49 | 95 | 95.00 | 99.00  | 100.00 |
| No.50 | 95 | 96.00 | 98.00  | 95.00  |

Supplementary table 2. Summary of the dose-volume histogram-based parameters of the planned target volumes of patients from the Xiangxi Autonomous Prefecture People's Hospital

| Patient ID | Conventional radiotherapy | 3L-RT   |          |         |
|------------|---------------------------|---------|----------|---------|
|            | PTV V60                   | PTV V54 | PGTV V60 | GTV V74 |
| No.1       | 96                        | 99.5    | 100      | 96.3    |
| No.2       | 98.6                      | 100     | 100      | 99.6    |
| No.3       | 95.0                      | 98      | 98.8     | 96.8    |
| No.4       | 95                        | 97.5    | 100      | 94.7    |
| No.5       | 96.3                      | 100     | 100      | 99.2    |
| No.6       | 95.6                      | 100     | 100      | 95.0    |
| No.7       | 96                        | 100     | 100      | 96.6    |
| No.8       | 96.0                      | 100     | 190      | 99.4    |
| No.9       | 95.3                      | 99.0    | 97.7     | 95.1    |
| No.10      | 97.6                      | 97.3    | 99.3     | 94.0    |
| No.11      | 97                        | 98.2    | 100      | 96.8    |
| No.12      | 95                        | 98.6    | 100      | 98      |
| No.13      | 96.4                      | 98.0    | 100      | 98.0    |
| No.14      | 95.0                      | 94.4    | 99.3     | 93.6    |
| No.15      | 96                        | 94.7    | 100      | 97.2    |
| No.16      | 95.3                      | 100     | 100      | 95.1    |
| No.17      | 96.7                      | 100     | 100      | 98.9    |
| No.18      | 95.1                      | 97.8    | 100      | 69.5    |

|       |      |      |       |      |
|-------|------|------|-------|------|
| No.19 | 95.1 | 100  | 100   | 96.5 |
| No.20 | 97.4 | 98.4 | 100   | 94.3 |
| No.21 | 95.2 | 91.1 | 100   | 96.1 |
| No.22 | 95.1 | 99.5 | 100   | 95.1 |
| No.23 | 95.6 | 97.6 | 100   | 96.1 |
| No.24 | 95.1 | 95.6 | 99.3  | 95.1 |
| No.25 | 95.6 | 96.8 | 100   | 96.9 |
| No.26 | 95.1 | 95.5 | 100   | 94.5 |
| No.27 | 95.3 | 91.7 | 99.5  | 90.9 |
| No.28 | 95.6 | 98.9 | 99.5  | 96.6 |
| No.29 | 97.6 | 100  | 100   | 98.3 |
| No.30 | 95   | 98.4 | 100   | 98.0 |
| No.31 | 95.7 | 97.3 | 100   | 98.1 |
| No.32 | 95.1 | 94.8 | 99.5  | 96.0 |
| No.33 | 97.4 | 96.3 | 100   | 97.8 |
| No.34 | 96.3 | 99.2 | 100   | 97.7 |
| No.35 | 99.6 | 97.5 | 100   | 91.5 |
| No.36 | 95.7 | 95.9 | 99.1  | 91.8 |
| No.37 | 95.2 | 96.7 | 100   | 94.5 |
| No.38 | 95.1 | 97.6 | 100   | 93.6 |
| No.39 | 96.5 | 98.4 | 100   | 97.4 |
| No.40 | 98.9 | 100  | 100   | 100  |
| No.41 | 96.2 | 98.6 | 100   | 96.3 |
| No.42 | 95.1 | 95.0 | 100   | 93.9 |
| No.43 | 95.1 | 93.7 | 100   | 94.9 |
| No.44 | 96   | 99.2 | 100   | 97.9 |
| No.45 | 97.3 | 99.3 | 99.10 | 95.7 |
| No.46 | 95.1 | 100  | 100   | 90.4 |
| No.47 | 97.1 | 98.9 | 100   | 94.2 |
| No.48 | 98.3 | 99.3 | 100   | 100  |
| No.49 | 97.9 | 100  | 100   | 96.7 |
